# Supplementary material for: Likelihood of infection in patients with presumed sepsis at the time of intensive care unit admission: a cohort study
Source: PubMed Central journal article supplement (PMC4562354; doi:10.1186/s13054-015-1035-1), 2015-09-07
Supplement: 13054_2015_1035_MOESM1_ESM.pdf [file 13054_2015_1035_MOESM1_ESM.pdf]

## **ONLINE DATA SUPPLEMENT**

### **Presence of infection in patients with presumed sepsis at the time of intensive care unit admission: a cohort study**

Peter M.C. Klein Klouwenberg, Olaf L. Cremer, Lonneke A. van Vught, David S.Y. Ong, Jos F. Frencken, Marcus J. Schultz, Marc J. Bonten, Tom van der Poll

**Table S1 Diagnoses in patients admitted with sepsis by infection likelihood**

| <b>None</b>                | <b>332</b> | <b>Possible</b>            | <b>771</b> | <b>Probable</b>            | <b>633</b> | <b>Definite</b>             | <b>843</b> |
|----------------------------|------------|----------------------------|------------|----------------------------|------------|-----------------------------|------------|
| <b>Cardiovascular</b>      | <b>117</b> | <b>Cardiovascular</b>      | <b>203</b> | <b>Infectious</b>          | <b>253</b> | <b>Infectious</b>           | <b>310</b> |
| Cardiac arrest             | 26         | Cardiac arrest             | 79         | Pneumonia                  | 161        | Sepsis                      | 112        |
| Congestive heart failure   | 13         | Congestive heart failure   | 34         | Sepsis                     | 65         | Pneumonia                   | 93         |
| Cardiovascular surgery     | 6          | CABG                       | 13         | Endocarditis               | 8          | Endocarditis                | 22         |
| Rhythm disturbance         | 5          | Cardiovascular surgery     | 10         | Surgery for infection      | 6          | Surgery for infection       | 17         |
| Cardiomyopathy             | 5          | Cardiogenic shock          | 9          | Soft tissue infection      | 4          | Soft tissue infection       | 17         |
| <b>Neurologic</b>          | <b>65</b>  | <b>Infectious</b>          | <b>156</b> | <b>Cardiovascular</b>      | <b>191</b> | <b>Gastrointestinal</b>     | <b>210</b> |
| Subarachnoid hemorrhage    | 16         | Pneumonia                  | 92         | Cardiac arrest             | 29         | Perforation                 | 49         |
| Seizures                   | 7          | Sepsis                     | 43         | Congestive heart failure   | 12         | Compl. of previous bleeding | 34         |
| Coma                       | 5          | Renal infection            | 7          | Cardiomyopathy             | 5          | Upper GI bleeding           | 11         |
| Intracranial hemorrhage    | 4          | Infection/abscess          | 4          | Cardiogenic shock          | 4          | Surgery                     | 10         |
| Overdose                   | 3          | Soft tissue infection      | 3          | Hemorrhage                 | 4          | Vascular ischemia           | 7          |
| <b>Respiratory</b>         | <b>50</b>  | <b>Neurologic</b>          | <b>119</b> | <b>Gastrointestinal</b>    | <b>82</b>  | <b>Cardiovascular</b>       | <b>90</b>  |
| Emphysema                  | 12         | Subarachnoid hemorrhage    | 26         | Perforation                | 22         | Congestive heart failure    | 14         |
| Pleural effusions          | 5          | Seizures                   | 16         | Compl. of previous surgery | 4          | Cardiac arrest              | 11         |
| Astma                      | 4          | Coma                       | 13         | Hemorrhage                 | 4          | Aortic valve replacement    | 5          |
| ARDS                       | 3          | Stroke                     | 12         | Surgery                    | 4          | Cardiovascular surgery      | 4          |
| Atelectasis                | 3          | Subdural hematoma          | 5          | Vascular ischemia          | 3          | Abdominal aortic aneurysm   | 4          |
| <b>Infectious</b>          | <b>39</b>  | <b>Respiratory</b>         | <b>118</b> | <b>Neurologic</b>          | <b>81</b>  | <b>Respiratory</b>          | <b>81</b>  |
| Pneumonia                  | 22         | Emphysema                  | 16         | Subarachnoid hemorrhage    | 15         | Pleural effusions           | 11         |
| Sepsis                     | 11         | Atelectasis                | 13         | Stroke                     | 9          | ARDS                        | 11         |
| Endocarditis               | 4          | Airway obstruction         | 13         | Seizures                   | 7          | Atelectasis                 | 10         |
| Renal infection            | 2          | Pleural effusions          | 11         | Intracranial hemorrhage    | 4          | Airway obstruction          | 8          |
|                            |            | Pulmonary embolus          | 8          | Subdural hematoma          | 4          | Emphysema                   | 7          |
| <b>Gastrointestinal</b>    | <b>38</b>  | <b>Gastrointestinal</b>    | <b>100</b> | <b>Respiratory</b>         | <b>72</b>  | <b>Neurologic</b>           | <b>35</b>  |
| Hemorrhage                 | 9          | Perforation                | 17         | ARDS                       | 11         | Coma                        | 4          |
| Compl. of previous surgery | 4          | Vascular ischemia          | 9          | Emphysema                  | 8          | Subarachnoid hemorrhage     | 4          |
| Perforation                | 3          | Compl. of previous surgery | 7          | Atelectasis                | 7          | Intracranial hemorrhage     | 4          |
| GI surgery                 | 3          | Obstruction                | 7          | Pleural effusions          | 6          | Overdose                    | 3          |
| Obstruction                | 2          | Hemorrhage                 | 4          | Airway obstruction         | 6          | Subdural hematoma           | 3          |

The top five of diagnoses per organ system are shown. Not shown are less frequently occurring metabolic, hematologic and genito-urinary organ systems, trauma, and transplantation. Abbreviations: ARDS adult respiratory distress syndrome; CABG coronary artery bypass grafting; Compl. Complications; GI gastro-intestinal.
